# Supplementary material for: Deep reinforcement learning task scheduling method based on server real-time performance
Source: PeerJ journal article supplement (doi:10.7717/peerj-cs.2120), 2024-06-21
Supplement: Experiment_records.xlsx [file Experiment_records.xlsx]

## Sheet: Sheet1
Number of different tasks (arrival rate 20, number of virtual machines 10, standard deviation of task length 20)
Number of tasks	Random	Round-Robin	EITF	BEST-FIT	SRP-DRL
8000	0.918	0.652	0.952	0.683	0.453	Task response time
	0.556	0.778	0.347	0.684	0.87	Success rate
	0.064	0.062	0.048	0.072	0.06	Average load variance
12000	0.914	0.656	0.953	0.683	0.47
	0.556	0.777	0.348	0.684	0.871
	0.064	0.062	0.049	0.071	0.06
16000	0.911	0.653	0.946	0.686	0.489
	0.556	0.778	0.348	0.682	0.872
	0.064	0.062	0.048	0.072	0.06
20000	0.909	0.654	0.95	0.684	0.485
	0.557	0.776	0.347	0.683	0.871
	0.064	0.062	0.048	0.072	0.06
24000	0.912	0.656	0.95	0.683	0.486
	0.556	0.775	0.347	0.683	0.869
	0.064	0.062	0.048	0.071	0.06
Different task arrival rates (number of tasks 8000, number of virtual machines 10, standard deviation of task length 20)
Task arrival rate	Random	Round-Robin	EITF	BEST-FIT	SRP-DRL
20	0.918	0.652	0.952	0.683	0.453	Task response time
	0.556	0.778	0.347	0.684	0.87	Success rate
	0.064	0.062	0.048	0.072	0.06	Average load variance
25	0.977	0.802	0.95	0.721	0.514
	0.502	0.653	0.297	0.644	0.778
	0.066	0.062	0.049	0.07	0.056
30	1.026	0.899	0.947	0.759	0.583
	0.456	0.568	0.257	0.598	0.692
	0.067	0.061	0.049	0.065	0.053
35	1.073	0.968	0.942	0.794	0.597
	0.418	0.511	0.227	0.552	0.615
	0.067	0.06	0.049	0.061	0.05
40	1.113	1.022	0.948	0.823	0.655
	0.387	0.467	0.203	0.51	0.554
	0.067	0.059	0.049	0.057	0.047
Number of different virtual machines (number of tasks 8000, arrival rate 40, standard deviation of task length 20)
Number of virtual machines	Random	Round-Robin	EITF	BEST-FIT	SRP-DRL
10	1.113	1.022	0.948	0.823	0.655	Task response time
	0.387	0.467	0.203	0.51	0.554	Success rate
	0.067	0.059	0.049	0.057	0.047	Average load variance
12	1.064	0.947	0.934	0.796	0.567
	0.429	0.527	0.23	0.57	0.646
	0.069	0.061	0.049	0.063	0.05
14	1.017	0.876	0.931	0.779	0.508
	0.469	0.586	0.255	0.611	0.731
	0.069	0.063	0.049	0.07	0.053
16	0.973	0.792	0.924	0.768	0.481
	0.501	0.661	0.284	0.636	0.8
	0.068	0.064	0.049	0.076	0.057
18	0.941	0.69	0.93	0.763	0.447
	0.53	0.742	0.307	0.644	0.87
	0.068	0.064	0.049	0.079	0.059
Standard deviation of different task lengths (arrival rate 30, number of virtual machines 10, number of tasks 8000)
task length standard deviation	Random	Round-Robin	EITF	BEST-FIT	SRP-DRL
10	1.03	0.905	0.941	0.761	0.589	Task response time
	0.457	0.567	0.255	0.599	0.69	Success rate
	0.067	0.059	0.048	0.065	0.052	Average load variance
20	1.026	0.899	0.947	0.759	0.583
	0.456	0.568	0.257	0.598	0.692
	0.067	0.061	0.049	0.065	0.053
30	1.013	0.882	0.952	0.748	0.563
	0.453	0.563	0.262	0.59	0.692
	0.067	0.063	0.051	0.067	0.053
40	0.993	0.856	0.961	0.732	0.528
	0.447	0.555	0.269	0.577	0.691
	0.067	0.065	0.053	0.069	0.055
50	0.975	0.824	0.973	0.718	0.508
	0.444	0.549	0.277	0.565	0.688
	0.067	0.066	0.056	0.071	0.057
